# Supplementary material
Source: Royal Society of Chemistry journal article supplement (doi:10.1039/d6cc00410e)
Supplement: d6cc00410e1.pdf [file d6cc00410e1.pdf]

## Supporting Information

### **Cobalt confined within nitrogen-doped porous carbon to enhance the redox kinetics and cycling stability of zinc-iodine batteries**

Yongzhi Chen<sup>a</sup>, Zhongyang Pan<sup>a</sup>, Xiaobo Xu<sup>b</sup>, Xinyang Wang<sup>b</sup>, Feili Lai<sup>a,\*</sup>

*<sup>a</sup>State Key Laboratory of Metal Matrix Composites, School of Materials Science and  
Engineering, Shanghai Jiao Tong University, Shanghai 200240, P. R. China*

*<sup>b</sup>Zhejiang Hanwei Technology Co., Ltd., Hangzhou 311121, P. R. China*

\* Corresponding authors (E-mail: feililai@sjtu.edu.cn)

## **Experimental Section**

### **Synthesis of nitrogen-doped porous carbon (NPC) and nitrogen-doped porous carbon with cobalt cluster (NPC-Co)**

Typically, 0.1 mmol of cobalt(II) chloride hexahydrate ( $\text{CoCl}_2 \cdot 6\text{H}_2\text{O}$ , 99.9%, Macklin) was dissolved in 60 mL of deionized water, followed by the addition of 4.5 g of zinc gluconate (98%, Macklin). The mixture was stirred for 10 min to form a homogeneous solution, then rapidly frozen using liquid nitrogen and freeze-dried for 24 h. The obtained solid precursor was transferred to a crucible and placed at the center of a tubular furnace. An open crucible containing 10 g of urea (99%, Macklin) was positioned upstream. The sample was pyrolyzed at 950 °C for 1 h under a nitrogen atmosphere with a heating rate of 5 °C  $\text{min}^{-1}$ . After cooling to room temperature, the as-pyrolyzed product was acid-washed in 0.5 M dilute hydrochloric acid (HCl, AR) for 1 h to remove excess cobalt and residual inorganic impurities, followed by thorough washing with deionized water until neutral pH was reached. The final product was collected after drying at 60 °C for 6 h and denoted as NPC-Co. NPC was prepared using the same procedure, except that  $\text{CoCl}_2 \cdot 6\text{H}_2\text{O}$  was not added.

### **Preparations of NPC-Co@I<sub>2</sub> and NPC@I<sub>2</sub>**

The NPC-Co@I<sub>2</sub> composite was prepared via a melt-diffusion method. Typically, NPC-Co and elemental iodine were mixed at a mass ratio of 1:3 and sealed in a glass vial, then heated at 120 °C for 6 h. After cooling to room temperature, the mixture was further dried in an oven at 60 °C for 3 h to remove excess iodine. The NPC@I<sub>2</sub> composite was prepared using the same procedure.

### **Materials and structural characterizations**

The crystal structures were analyzed using X-ray diffraction (XRD, MiniFlex 600) with Cu K $\alpha$  radiation. The degree of graphitization in NPC and NPC-Co was examined using a confocal Raman spectrometer (Renishaw inVia Qontor). The iodine contents in NPC@I<sub>2</sub> and NPC-Co@I<sub>2</sub> were determined by thermogravimetric analysis (TGA, TA Instruments 550). Nitrogen adsorption-desorption isotherms were measured using a surface area and porosity analyzer (Micromeritics ASAP 2460), and the Brunauer-Emmett-Teller (BET) surface areas of NPC and NPC-Co were calculated accordingly. The morphologies and microstructures of NPC, NPC-Co, and NPC-Co@I<sub>2</sub> were observed using scanning electron microscopy (SEM, TESCAN Mira3). X-ray photoelectron spectroscopy (XPS, Thermo Scientific K-Alpha) was used to investigate the elemental compositions and chemical states of NPC@I<sub>2</sub> and NPC-Co@I<sub>2</sub>.

### **Electrochemical measurements**

A slurry was prepared by mixing sodium alginate (as an aqueous binder) and acetylene black with the active material at a mass ratio of 8:1:1, using deionized water as the solvent. The resulting slurry was coated onto titanium foil with an active material loading of 0.8-1.1 mg cm<sup>-2</sup>. The electrodes were then dried at 60 °C for 6 h. CR2032-type coin cells were assembled in ambient air using zinc foil as the anode, a glass fiber membrane as the separator, and 80  $\mu$ L of 2 M ZnSO<sub>4</sub> as the electrolyte. After assembly, the cells were allowed to rest for 12 h before electrochemical measurements. Galvanostatic charge/discharge tests were conducted using a LAND-CT2001A battery tester within a voltage window of 0.6-1.6 V (vs. Zn/Zn<sup>2+</sup>). Cyclic voltammetry (CV) was performed on a CHI660E electrochemical workstation at scan rates ranging from

1 to 20 mV s<sup>-1</sup> within the same voltage range. Electrochemical impedance spectroscopy (EIS) was also carried out on the CHI660E, over a frequency range of 0.01 Hz to 1 MHz. Specific capacities were calculated based on the mass of iodine.

### **Calculation of the b values and ratio of pseudo-capacitive contribution**

The kinetic behavior was analyzed based on cyclic voltammetry (CV) measurements. The relationship between the peak current (*i*) and the scan rate (*v*) can be described by the following equation:

$$i = a v^b \quad (\text{S1})$$

where *a* and *b* are adjustable parameters. By taking the logarithm of both sides of Eq. (S1), the equation can be rewritten as:

$$\log(i) = \log(a) + b \log(v) \quad (\text{S2})$$

The parameter *b* can be determined from the slope of the linear fitting of log(*i*) versus log(*v*), which provides insight into the charge-storage mechanism.

To further quantify the capacitive and diffusion-controlled contributions, the current response (*i*) at a given potential can be separated into two components according to:

$$i = k_1 v + k_2 v^{1/2} \quad (\text{S3})$$

where  $k_1 v$  represents the surface-controlled capacitive contribution, and  $k_2 v^{1/2}$  corresponds to the diffusion-limited Faradaic process. By rearranging Eq. (S3), the equation can be expressed as:

$$i/v^{1/2} = k_1 v^{1/2} + k_2 \quad (\text{S4})$$

Accordingly, the value of  $k_1$  can be obtained from the slope of the linear fitting of  $i/v^{1/2}$

versus  $\nu^{1/2}$ , enabling quantitative evaluation of the capacitive contribution.

## Supplementary figures

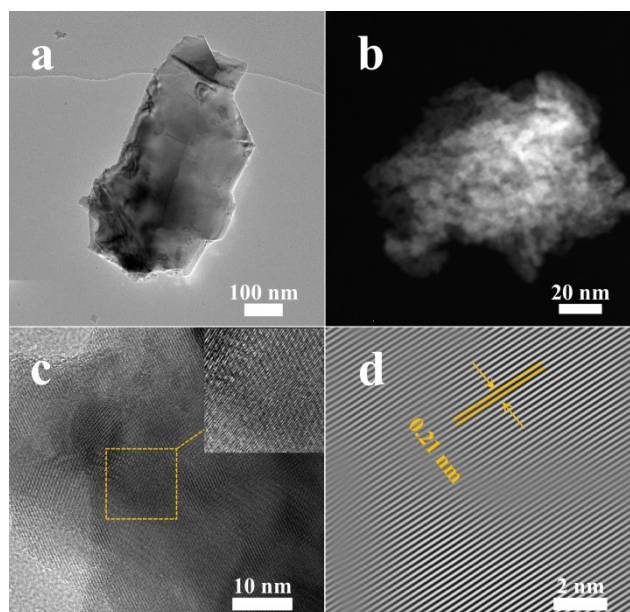

**Fig. S1.** Morphology and lattice features of NPC-Co. (a) TEM, (b) HAADF-STEM, (c) HRTEM, and (d) inverse FFT images of NPC-Co.

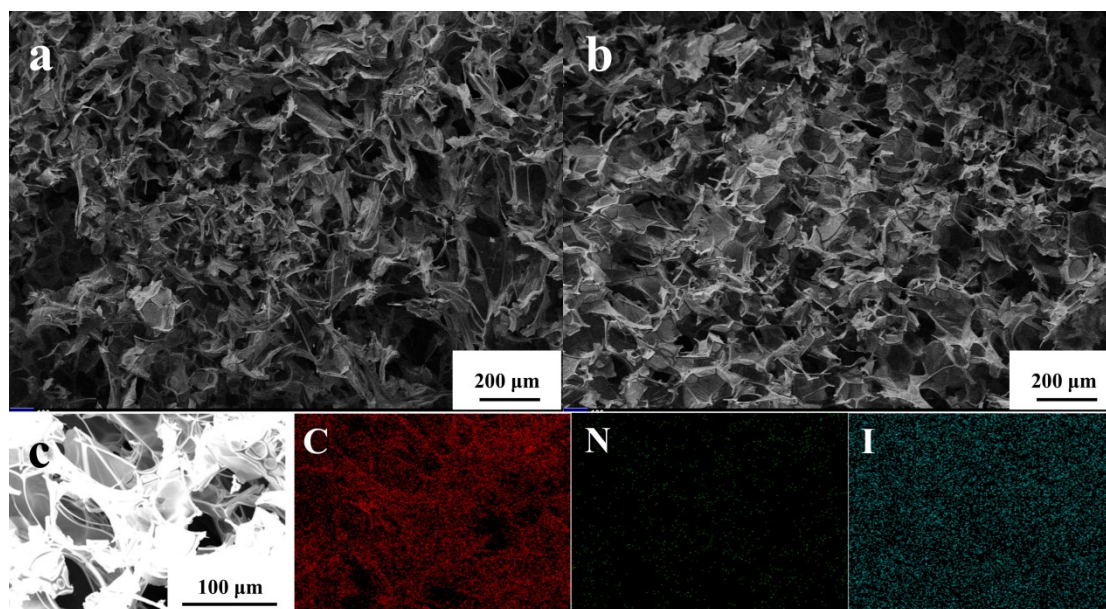

**Fig. S2.** Morphology of NPC and NPC@I<sub>2</sub>. SEM images of (a) NPC and (b) NPC@I<sub>2</sub>. (c) SEM image and corresponding EDS elemental mappings of NPC@I<sub>2</sub>.

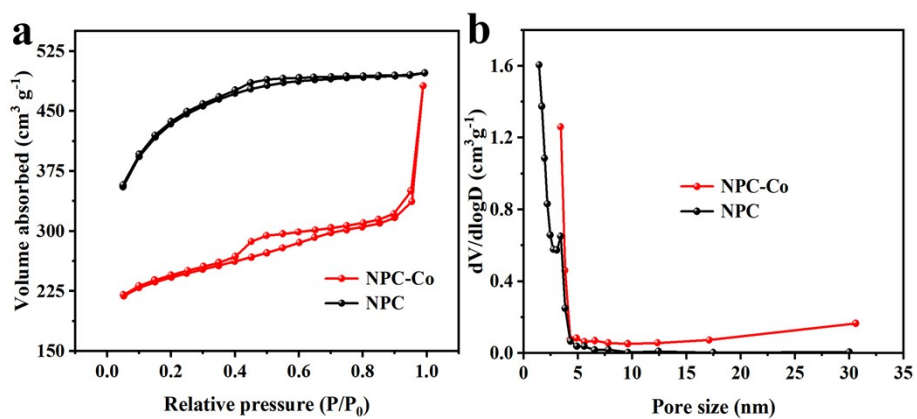

**Fig. S3.** Structural characterization of NPC and NPC-Co. (a) Nitrogen adsorption-desorption isotherms, and (b) pore size distributions of NPC and NPC-Co.

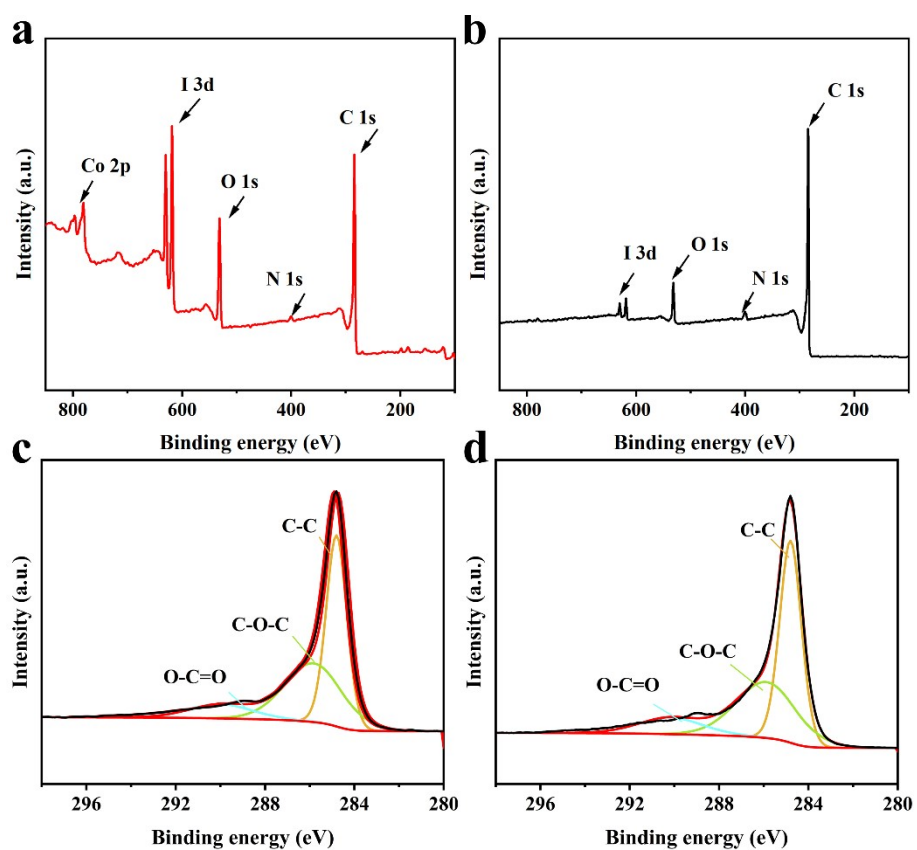

**Fig. S4.** XPS characterization of NPC-Co@I<sub>2</sub> and NPC@I<sub>2</sub>. (a, b) Survey spectra of NPC-Co@I<sub>2</sub> and NPC@I<sub>2</sub>. (c, d) High-resolution C 1s spectra of NPC-Co@I<sub>2</sub> and NPC@I<sub>2</sub>.

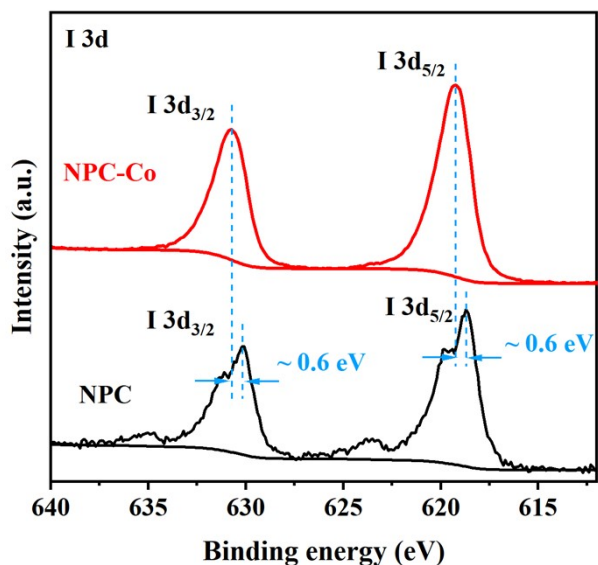

**Fig. S5.** Iodine chemical-state analysis of NPC-Co@I<sub>2</sub> and NPC@I<sub>2</sub>. High-resolution I 3d XPS spectra of NPC-Co@I<sub>2</sub> and NPC@I<sub>2</sub>.

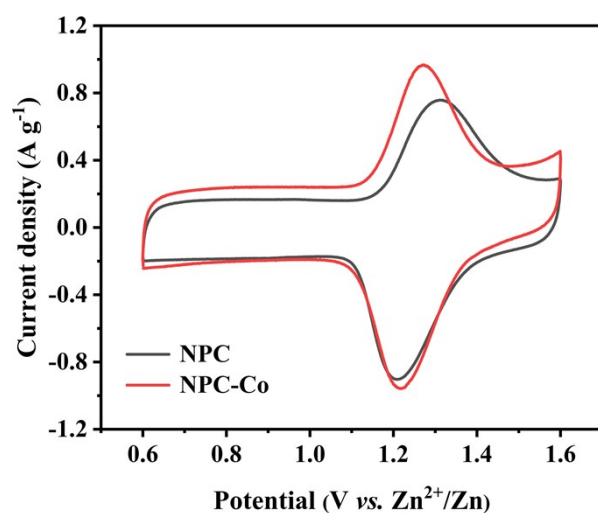

**Fig. S6.** Normalized CV curves of Zn//NPC-Co@I<sub>2</sub> cells and Zn//NPC@I<sub>2</sub> cells at 1 mV s<sup>-1</sup>.

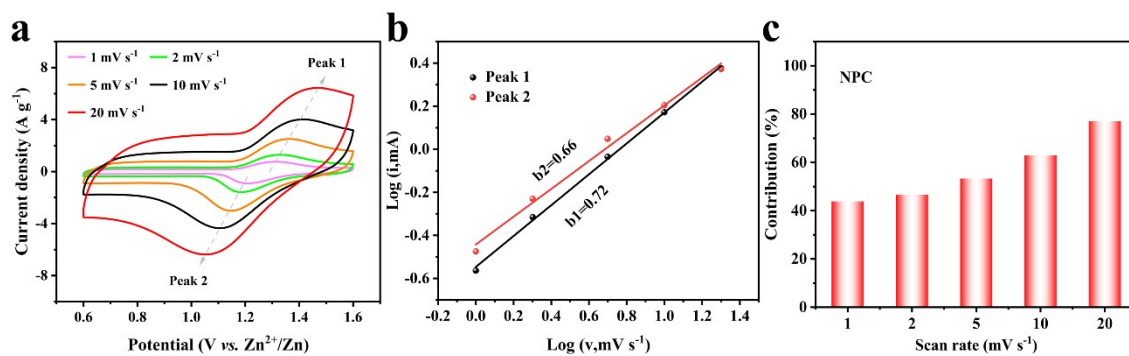

**Fig. S7.** Kinetic analysis of the Zn//NPC@I<sub>2</sub> battery. (a) CV curves of the Zn//NPC@I<sub>2</sub> battery at various scan rates. (b) Calculated b-values for the redox peaks of the Zn//NPC@I<sub>2</sub> battery. (c) Estimated capacitive contribution ratios at different scan rates.

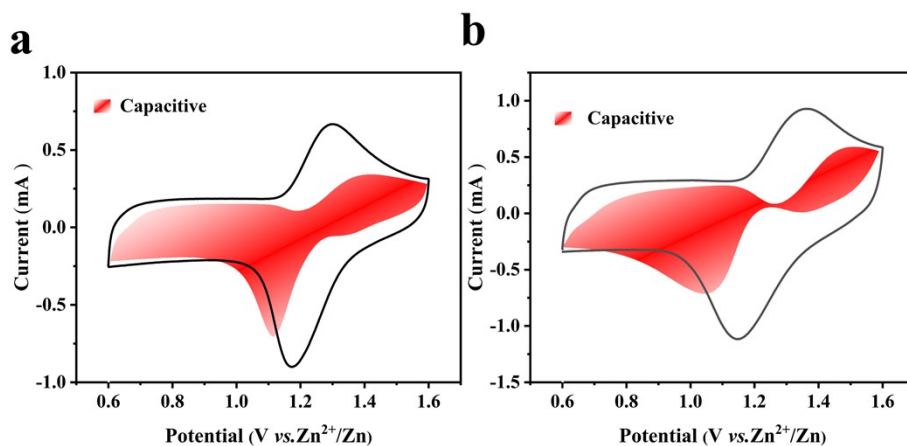

**Fig.S8.** Capacitive-controlled CV curves of (a) NPC-Co and (b) NPC at 5 mV s<sup>-1</sup>.

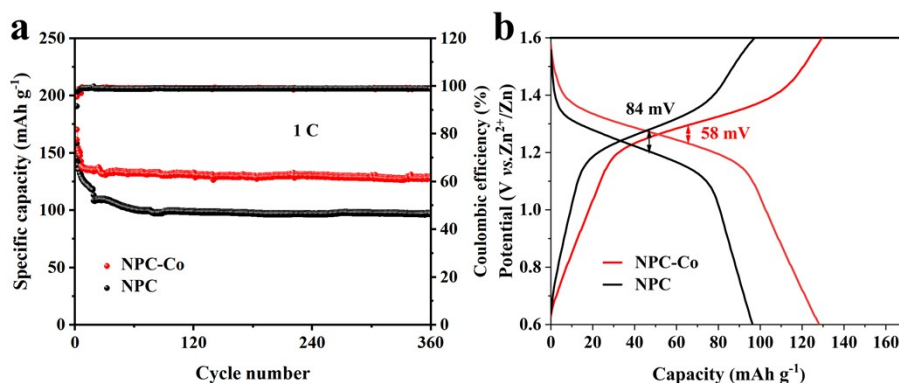

**Fig. S9.** Cycling performance of the Zn//NPC@I<sub>2</sub> battery. (a) Long-term cycling performance at 1 C. (b) Galvanostatic charge-discharge profiles at the 200th cycle.

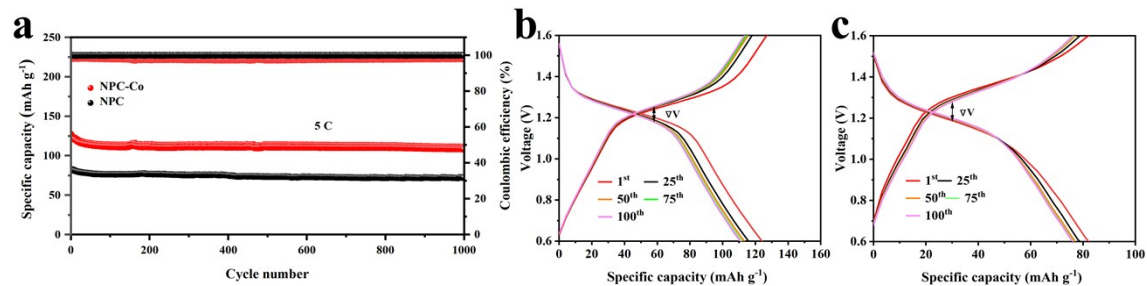

**Fig. S10.** Cycling performance of Zn//NPC-Co@I<sub>2</sub> and Zn//NPC@I<sub>2</sub> batteries. (a)

Long-term cycling performance at 5 C. (b) Galvanostatic charge discharge curves of Zn//NPC-Co@I<sub>2</sub> and (c) NPC@I<sub>2</sub> cathode at different cycles.

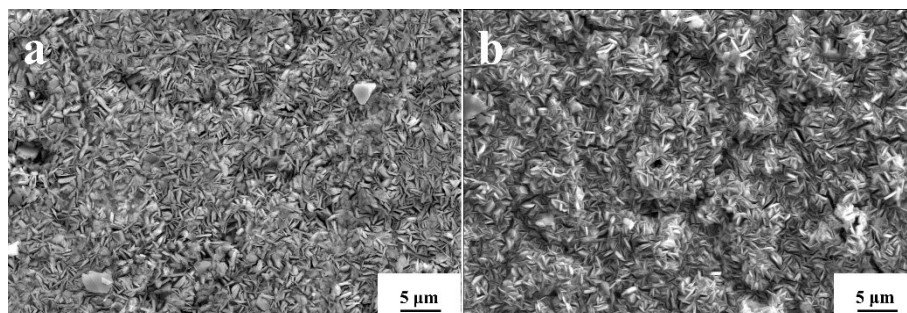

**Fig. S11.** SEM images of Zn anodes after 100 cycles at 1 C for Zn anodes from (a) Zn//NPC-Co@I<sub>2</sub> cells and (b) Zn//NPC@I<sub>2</sub> cells.

**Table S1.** Comparison of representative iodine cathodes reported for aqueous Zn–I<sub>2</sub> batteries and this work.

---

| Ref. | Host | Rate | Capacity (mAh g <sup>-1</sup> ) | Cycling performance |
|------|------|------|---------------------------------|---------------------|
|------|------|------|---------------------------------|---------------------|

---

|   |                         |                     |       |                                              |
|---|-------------------------|---------------------|-------|----------------------------------------------|
| 1 | I <sub>2</sub> -NPC-900 | 10 C                | 177.7 | 80.9% retention after 10,000 cycles          |
| 2 | HOPG/I <sub>2</sub>     | 5 A g <sup>-1</sup> | 278   | 97.6% retention after 15,000 cycles          |
| 3 | Functionalized graphene | 5 A g <sup>-1</sup> | 150   | 96.7% retention after 2000 cycles            |
| 4 | FeCoNi@I <sub>2</sub>   | 3 A g <sup>-1</sup> | 94.7  | 94.7 mAh g <sup>-1</sup> after 14,000 cycles |
| 5 | PPC-CH/I <sub>2</sub>   | 2 A g <sup>-1</sup> | 99.9  | >88% retention after 9000 cycles             |
| 6 | I <sub>2</sub> @NHPC    | 5.0 C               | 166.7 | 85.2% retention after 10,000 cycles          |

| Ref. | Host                    | Rate                 | Capacity (mAh g <sup>-1</sup> ) | Cycling performance               |
|------|-------------------------|----------------------|---------------------------------|-----------------------------------|
| 7    | I <sub>2</sub> @GP-CMTs | 12 A g <sup>-1</sup> | 101                             | 86.8% retention after 1000 cycles |

|           |                         |                       |       |                                            |
|-----------|-------------------------|-----------------------|-------|--------------------------------------------|
| 8         | I <sub>2</sub> @C-50    | 5 A g <sup>-1</sup>   | 116.7 | 66% retention after 10,000 cycles          |
| 9         | NS-YP80F@I <sub>2</sub> | 5 C                   | 125   | 125 mAh g <sup>-1</sup> after 800 cycles   |
| 10        | NMC/I <sub>2</sub>      | 0.1 A g <sup>-1</sup> | 91    | 80.7% retention after 100 cycles           |
| 11        | I <sub>2</sub> -AC-6    | 5 A g <sup>-1</sup>   | 89.7  | 90% retention after 6000 cycles            |
| 12        | N-LPC/I <sub>2</sub>    | 0.1 A g <sup>-1</sup> | 127   | 127 mAh g <sup>-1</sup> after 100 cycles   |
| This work | NPC-Co@I <sub>2</sub>   | 5 C                   | 109.3 | 97.6 mAh g <sup>-1</sup> after 1500 cycles |

---

Note: For this work, 1 C = 211 mA g<sup>-1</sup>.

## References

- 1 D. Yu, A. Kumar, T. A. Nguyen, M. T. Nazir and G. Yasin, *ACS Sustain. Chem. Eng.*, 2020, **8**, 13769.
- 2 J. Zhang, Q. Dou, C. Yang, L. Zang and X. Yan, *J. Mater. Chem. A*, 2023, **11**, 3632.
- 3 H. X. Dang, A. J. Sellathurai and D. P. J. Barz, *Energy Storage Mater.*, 2023, **55**, 680.

- 4 Y. Gao, Y. Liu, X. Guo, J. Zhang, C. Zhou, F. Li, Z. Xu, Z. Zhao, Z. Xing, P. Rao, Z. Kang, X. Tian and X. Shi, *Adv. Funct. Mater.*, 2024, **35**, 2421714.
- 5 C. Chen, C. Liu, H. Huang, S. Luo, M. Xie, D. Ma, F. Zeng and X. Liang, *Electrochim. Acta*, 2026, **559**, 148584.
- 6 Z. Gong, C. Song, C. Bai, X. Zhao, Z. Luo, G. Qi, X. Liu, C. Wang, Y. Duan and Z. Yuan, *Sci. China Mater.*, 2023, **66**, 556.
- 7 S. Chai, J. Yao, Y. Wang, J. Zhu and J. Jiang, *Chem. Eng. J.*, 2022, **439**, 135676.
- 8 W. Li, K. Wang and K. Jiang, *J. Mater. Chem. A*, 2020, **8**, 3785.
- 9 W. Feng, Y. Wang, F. Tian, Z. Liu, X. Wei, C. Ma, G. Ma, Z. Li, D. Kong and L. Zhi, *Energy Storage Mater.*, 2024, **73**, 103812.
- 10 M. Zhang, Y. Hou, Y. Zhu, M. Ren, X. Cai, Q. Liu, C. Qiao, W. Liu and J. Yao, *J. Electroanal. Chem.*, 2025, **976**, 118798.
- 11 Y. Zhang, X. Zhang, X. Li, C. Chen, D. Yu and G. Zhao, *J. Alloys Compd.*, 2024, **976**, 173041.
- 12 Y. Ji, J. Xu, Z. Wang, M. Ren, Y. Wu, W. Liu, J. Yao, C. Zhang and H. Zhao, *J. Electroanal. Chem.*, 2023, **931**, 117188.
